# Supplementary material for: Fabrication and Mechanical Performance of Non-Crimp Unidirectional Jute-Yarn Preform-Based Composites
Source: MDPI journal article supplement (doi:10.3390/molecules26216664), 2021-11-03
Supplement: s1 [file s1]

## Supporting Information

### **Fabrication and mechanical performance of non-crimped unidirectional jute yarn preform based composites**

Yeasin Ali,<sup>1</sup> Atik Faisal,<sup>2</sup> Abu Saifullah,<sup>3</sup> Hom N Dhakal,<sup>3</sup> Shah Alimuzzaman<sup>4</sup> and Forkan Sarker<sup>1\*</sup>

<sup>1</sup> Department of Textile Engineering, Dhaka University of Engineering & Technology, DUET, Gazipur-1700, Bangladesh

<sup>2</sup> Department of Yarn Engineering, Bangladesh University of Textiles, Dhaka-1208, Bangladesh

<sup>3</sup> Advanced Polymers and Composites (APC) Research Group, School of Mechanical and Design Engineering, University of Portsmouth, Portsmouth PO1 3DJ, UK

<sup>4</sup> Department of Fabric Engineering, Bangladesh University of Textiles, Dhaka-1208, Bangladesh

\* Correspondence: Forkan Sarker, UN Fellow, Commonwealth Scholar, Associate professor, Department of Textile Engineering, Dhaka University of Engineering and Technology, Email: forkan@duet.ac.bd, Cell No: +8801312717271

#### **Supporting Information 1**

Different linear density of yarns has been used in this study. In these three types of yarn based on their linear density ( 20,25 and 30 lbs/spyndle ) were used. Digital images of the three yarn packages from left to right can be seen in Figure S1.

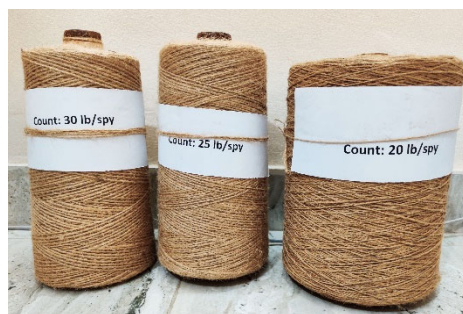

**Figure S1.** Digital images of jute yarns used in this study where the yarn liner densities from left are 30, 25 and 20 pound/spyndle.

## Supporting Information 2

Tensile and flexural properties novel UD jute yarn composites are reported in Table S1.

A significant different in the tensile properties is observed in this study among three different qualities of yarn-based jute/polyester composites. Stiffness of the UD jute composites has almost 4 times higher than the traditional woven composites. Similar trend is also observed in the bending properties. In this study we found that yarn with 25 lbs/spyndle offer highest mechanical properties than the other composites made from 20 and 30 lb/spyndle (see Table S1).

**Table S1.** Tensile and flexural properties of natural jute yarn composites made from UD and woven architecture.

| Composite type | Tensile Strength (MPa) | Tensile Modulus (GPa) | Flexural Strength (MPa) | Flexural Modulus (GPa) |
|----------------|------------------------|-----------------------|-------------------------|------------------------|
| W20            | 54 ( $\pm 5$ )         | 2.5 ( $\pm 0.2$ )     | 70 ( $\pm 7$ )          | 2.7 ( $\pm 0.25$ )     |
| UD20           | 93.57 ( $\pm 11$ )     | 5.66 ( $\pm 0.74$ )   | 172.18 ( $\pm 9$ )      | 5.06 ( $\pm 0.3$ )     |
| UD25           | 132.79( $\pm 12$ )     | 8.31 ( $\pm 1$ )      | 171.56 ( $\pm 13$ )     | 6.44 ( $\pm 0.13$ )    |
| UD30           | 125.60( $\pm 7$ )      | 7.80 ( $\pm 0.57$ )   | 178.34 ( $\pm 6$ )      | 5.83 ( $\pm 0.24$ )    |
